# Supplementary material
Source: publisher site journal article supplement (https://www.dovepress.com/article/377262)
Supplement: Supplementary file 1 [file get_supplementary_file.php]

**Supplemental Materials 1.** Search strategy utilized for five electronic databases (EMBASE, Medline, Cochrane Central Register of Controlled Trials, Cochrane Database of Systematic Reviews, Web of Science)

**Embase**

1. (ophth* or ocular or intraocular or eye* or retina* or macula* or fovea* or uvea* or sclera* or cornea* or conjunctiva* or iris or "vitreous body" or "vitreous humo?r" or "vitreous fluid" or vitreo* or "aqueous humo?r" or "aqueous fluid" or tears or ((tear or lacrimal) adj fluid) or glaucoma or retinop* or retinoblastoma or uveitis or iritis or choroiditis or retinitis or chorioretinitis or conjunctivitis or endophthalmitis or cataract* or ?????????opia or "optic atrophy" or "optic neuropathy" or vitrectomy or phacoemulsification or trabeculotomy or (paracentesis adj3 "anterior chamber")).tw.
2. ("precision medicine" or "precision health" or "personalized medicine" or "personalized proteomics" or thera?nostic? or "tailored medicine" or "artificial intelligence" or "machine learning" or "deep learning" or algorithm? or ((supervised or unsupervised or biased or unbiased or bayesian or hierarchical or neur??al) adj (cluster* or learning or learner? or classifi* or network?)) or "k-nearest neighbo?r?" or "naive bayes" or (decision adj (tree? or forest? or jungle?)) or "random forest?" or "gradient-boost*" or "support vector machine" or "k-means" or "association rules" or "recursive partitioning" or "discriminant analysis" or "feature selection" or ((linear or nonlinear or "non-linear" or logistic or ordinal or poisson or quantile or analysis) adj1 (regression? or model?)) or bioinformatic? or "gene ontology" or "Kyoto Encyclopedia of Genes and Genomes" or "KEGG" or ((progress* or regress* or recover* or respond* or response*) and (predict* or stratif*))).tw.
3. (Proteomic? or proteome? or metabolomic? or metabolome? or lipidomic? or lipidome? or "?????inflammatory protein?" or "?????inflammatory marker" or cytokine? or interleukin? or lymphokine? or monokine? or interferon? or "colony stimulating factor?" or chemokine? or "growth factor?" or "necrosis factor?" or "chemotactic protein?" or "adhesion molecule?" or "adhesion protein?" or "matrix metalloproteinase-2" or myeloperoxidase? or "tissue inhibitor of metalloproteinase-2" or "macrophage inflammatory protein-1" or "brain-derived neurotrophic factor" or angiopoietin? or ((hemoglobin or haemoglobin) adj1 (a1c or glycated)) or hba1c or "c reactive protein" or "c-reactive protein" or crp or hscrp or "hs-crp" or ((protein or biomarker) and (concentration? or level? or quantif* or quantit* or mass spectrometry or iTRAQ or MALDI or SELDI or assay))).tw.
4. ophthalmology/
5. eye/ or anterior eye chamber/ or anterior eye segment/ or aqueous humor/ or exp conjunctiva/ or exp cornea/ or eye fundus/ or eyeball/ or exp lens/ or ocular blood vessel/ or ophthalmic artery/ or optic disk/ or palpebral fissure/ or posterior eye chamber/ or posterior eye segment/ or exp retina/ or exp sclera/ or sphincter pupillae muscle/ or tenon capsule/ or trabecular meshwork/ or exp uvea/ or vitreous body/
6. lacrimal fluid/
7. eye disease/ or exp accommodation disorder/ or exp conjunctiva disease/ or exp cornea disease/ or exp dry eye/ or exp eye burning/ or exp eye chamber disease/ or exp eye discharge/ or exp eye discomfort/ or exp eye edema/ or exp eye infection/ or exp eye inflammation/ or exp eye injury/ or exp eye irritation/ or exp eye jaundice/ or exp eye malformation/ or exp eye pain/ or exp eye redness/ or exp eye swelling/ or exp eye toxicity/ or exp eye tumor/ or exp glaucoma/ or exp intraocular hemorrhage/ or exp intraocular pressure abnormality/ or exp lens disease/ or exp ocular albinism/ or exp ocular fibrosis/ or exp ocular pruritus/ or exp ocular surface disease/ or exp optic nerve disease/ or exp photophobia/ or exp pupil disease/ or exp retina disease/ or exp sclera disease/ or exp uvea disease/ or exp visual disorder/ or exp vitreous disease/
8. exp vitrectomy/
9. exp phacoemulsification/
10. exp trabeculectomy/
11. personalized medicine/
12. theranostic nanomedicine/
13. algorithm/
14. exp clustering algorithm/
15. artificial intelligence/
16. exp machine learning/
17. "decision tree"/
18. bioinformatics/
19. exp regression analysis/
20. discriminant analysis/
21. gene ontology/
22. proteomics/ or comparative proteomics/ or immunoproteomics/ or exp pharmacoproteomics/ or phosphoproteomics/ or proteogenomics/ or secretomics/
23. proteome/
24. metabolomics/
25. metabolome/
26. lipidomics/
27. lipidome/
28. exp cytokine/
29. exp cell adhesion molecule/
30. myeloperoxidase/
31. "tissue inhibitor of metalloproteinase 1"/
32. "tissue inhibitor of metalloproteinase 2"/
33. brain derived neurotrophic factor/
34. exp angiopoietin/
35. exp "peptides and proteins"/ec [Endogenous Compound]
36. biological marker/ec [Endogenous Compound]
37. 1 or 4 or 5 or 6 or 7 or 8 or 9 or 10
38. 2 or 11 or 12 or 13 or 14 or 15 or 16 or 17 or 18 or 19 or 20 or 21
39. (concentration? or level? or quantif* or quantit* or mass spectrometry or iTRAQ or MALDI or SELDI or assay).tw.
40. (35 or 36) and 39
41. 3 or 22 or 23 or 24 or 25 or 26 or 27 or 28 or 29 or 30 or 31 or 32 or 33 or 34 or 40
42. 37 and 38 and 41
43. limit 42 to conference abstracts
44. limit 42 to animal studies
45. limit 44 to human
46. limit 42 to "review"
47. 44 not 45
48. 42 not (43 or 46 or 47)

**MEDLINE**

1. (ophth* or ocular or intraocular or eye* or retina* or macula* or fovea* or uvea* or sclera* or cornea* or conjunctiva* or iris or "vitreous body" or "vitreous humo?r" or "vitreous fluid" or vitreo* or "aqueous humo?r" or "aqueous fluid" or tears or ((tear or lacrimal) adj fluid) or glaucoma or retinop* or retinoblastoma or uveitis or iritis or choroiditis or retinitis or chorioretinitis or conjunctivitis or endophthalmitis or cataract* or ?????????opia or "optic atrophy" or "optic neuropathy" or vitrectomy or phacoemulsification or trabeculotomy or (paracentesis adj3 "anterior chamber")).tw.
2. ("precision medicine" or "precision health" or "personalized medicine" or "personalized proteomics" or thera?nostic? or "tailored medicine" or "artificial intelligence" or "machine learning" or "deep learning" or algorithm? or ((supervised or unsupervised or biased or unbiased or bayesian or hierarchical or neur??al) adj (cluster* or learning or learner? or classifi* or network?)) or "k-nearest neighbo?r?" or "naive bayes" or (decision adj (tree? or forest? or jungle?)) or "random forest?" or "gradient-boost*" or "support vector machine" or "k-means" or "association rules" or "recursive partitioning" or "discriminant analysis" or "feature selection" or ((linear or nonlinear or "non-linear" or logistic or ordinal or poisson or quantile or analysis) adj1 (regression? or model?)) or bioinformatic? or "gene ontology" or "Kyoto Encyclopedia of Genes and Genomes" or "KEGG" or ((progress* or regress* or recover* or respond* or response*) and (predict* or stratif*))).tw.
3. (Proteomic? or proteome? or metabolomic? or metabolome? or lipidomic? or lipidome? or "?????inflammatory protein?" or "?????inflammatory marker" or cytokine? or interleukin? or lymphokine? or monokine? or interferon? or "colony stimulating factor?" or chemokine? or "growth factor?" or "necrosis factor?" or "chemotactic protein?" or "adhesion molecule?" or "adhesion protein?" or "matrix metalloproteinase-2" or myeloperoxidase? or "tissue inhibitor of metalloproteinase-2" or "macrophage inflammatory protein-1" or "brain-derived neurotrophic factor" or angiopoietin? or ((hemoglobin or haemoglobin) adj1 (a1c or glycated)) or hba1c or "c reactive protein" or "c-reactive protein" or crp or hscrp or "hs-crp" or ((protein or biomarker) and (concentration? or level? or quantif* or quantit* or mass spectrometry or iTRAQ or MALDI or SELDI or assay))).tw.
4. exp Ophthalmology/cl, di, dg, ec, pd, px, sn, sd, su, th, td, ed, es, hi, is, mt, og, rt, st [Classification, Diagnosis, Diagnostic Imaging, Economics, Pharmacology, Psychology, Statistics & Numerical Data, Supply & Distribution, Surgery, Therapy, Trends, Education, Ethics, History, Instrumentation, Methods, Organization & Administration, Radiotherapy, Standards]
5. eye/ or exp anterior eye segment/ or "anterior capsule of the lens"/ or conjunctiva/ or meibomian glands/ or exp "pigment epithelium of eye"/ or exp posterior eye segment/ or exp retina/ or sclera/ or tenon capsule/ or exp uvea/
6. Tears/
7. eye diseases/ or cogan syndrome/ or exp conjunctival diseases/ or exp corneal diseases/ or exp eye abnormalities/ or exp eye diseases, hereditary/ or exp eye hemorrhage/ or exp eye infections/ or exp eye injuries/ or exp eye manifestations/ or exp eye neoplasms/ or exp lens diseases/ or exp ocular hypertension/ or ocular hypotension/ or exp optic nerve diseases/ or exp pupil disorders/ or exp refractive errors/ or exp retinal diseases/ or exp scleral diseases/ or exp uveal diseases/ or exp vision disorders/ or vitreous detachment/
8. Vitrectomy/ae, ec, ed, es, hi, is, mt, mo, nu, px, rh, st, sn, td [Adverse Effects, Economics, Education, Ethics, History, Instrumentation, Methods, Mortality, Nursing, Psychology, Rehabilitation, Standards, Statistics & Numerical Data, Trends]
9. Phacoemulsification/ae, cl, ec, ed, hi, is, mt, mo, nu, px, rh, st, sn, td [Adverse Effects, Classification, Economics, Education, History, Instrumentation, Methods, Mortality, Nursing, Psychology, Rehabilitation, Standards, Statistics & Numerical Data, Trends]
10. Trabeculectomy/nu, px, rh, st, sn, td, ae, cl, ec, ed, hi, is, mt, mo [Nursing, Psychology, Rehabilitation, Standards, Statistics & Numerical Data, Trends, Adverse Effects, Classification, Economics, Education, History, Instrumentation, Methods, Mortality]
11. Precision Medicine/ae, cl, ec, es, hi, is, mt, mo, nu, px, st, sn, td [Adverse Effects, Classification, Economics, Ethics, History, Instrumentation, Methods, Mortality, Nursing, Psychology, Standards, Statistics & Numerical Data, Trends]
12. Theranostic Nanomedicine/
13. exp algorithms/
14. Neural Networks, Computer/
15. Decision Trees/
16. exp Regression Analysis/
17. Discriminant Analysis/
18. exp Proteomics/cl, ec, ed, es, hi, is, mt, og, st, sn, td [Classification, Economics, Education, Ethics, History, Instrumentation, Methods, Organization & Administration, Standards, Statistics & Numerical Data, Trends]
19. Proteome/
20. exp Metabolomics/cl, ec, ed, es, hi, is, mt, og, st, sn, td [Classification, Economics, Education, Ethics, History, Instrumentation, Methods, Organization & Administration, Standards, Statistics & Numerical Data, Trends]
21. Metabolome/
22. exp Cytokines/
23. exp Cell Adhesion Molecules/
24. Matrix Metalloproteinase 2/
25. Peroxidase/
26. "Tissue Inhibitor of Metalloproteinase-1"/
27. "Tissue Inhibitor of Metalloproteinase-2"/Brain-Derived Neurotrophic Factor/
28. exp Angiopoietins/
29. Gene Ontology/
30. exp Proteins/
31. exp Peptides/
32. Biomarkers/
33. (concentration? or level? or quantif* or quantit* or mass spectrometry or iTRAQ or MALDI or SELDI or assay).tw.
34. (31 or 32 or 33) and 3
35. 1 or 4 or 5 or 6 or 7 or 8 or 9 or 10
36. 2 or 11 or 12 or 13 or 14 or 15 or 16 or 17 or 30
37. 3 or 18 or 19 or 20 or 21 or 22 or 23 or 24 or 25 or 26 or 27 or 28 or 29 or 35
38. 36 and 37 and 38
39. limit 39 to animals
40. limit 40 to humans
41. 40 not 41
42. limit 39 to "review articles"
43. 39 not (42 or 43)

**Web of Science**

1. (TI=(ophth* or ocular or intraocular or eye* or retina* or macula* or fovea* or uvea* or sclera* or cornea* or conjunctiva* or iris or "vitreous body" or "vitreous humo$r" or "vitreous fluid" or vitreo* or "aqueous humo$r" or "aqueous fluid" or tears or ((tear or lacrimal) NEAR/1 fluid) or glaucoma or retinop* or retinoblastoma or uveitis or iritis or choroiditis or retinitis or chorioretinitis or conjunctivitis or endophthalmitis or cataract* or *opia or "optic atrophy" or "optic neuropathy" or vitrectomy or phacoemulsification or trabeculotomy.tw. or (paracentesis NEAR/3 "anterior chamber")) or AB=(ophth* or ocular or intraocular or eye* or retina* or macula* or fovea* or uvea* or sclera* or cornea* or conjunctiva* or iris.tw. or "vitreous body" or "vitreous humo$r" or "vitreous fluid" or vitreo* or "aqueous humo$r" or "aqueous fluid" or tears or ((tear or lacrimal) NEAR/1 fluid) or glaucoma or retinop* or retinoblastoma or uveitis or iritis or choroiditis or retinitis or chorioretinitis or conjunctivitis or endophthalmitis or cataract* or "optic atrophy" or "optic neuropathy" or vitrectomy or phacoemulsification or trabeculotomy or (paracentesis NEAR/3 "anterior chamber"))) AND
2. (TI=("precision medicine" or "precision health" or "personalized medicine" or "personalized proteomics" or thera$nostic* or "tailored medicine" or "artificial intelligence" or "machine learning" or "deep learning" or algorithm$ or ((supervised or unsupervised or biased or unbiased or bayesian or hierarchical or neural or neuronal) NEAR/1 (cluster* or learning or learner$ or classifi* or network$)) or "k-nearest neighbo$r*" or "naive bayes" or (decision NEAR/1 (tree$ or forest$ or jungle$)) or "random forest$" or "gradient-boost*" or "support vector machine" or "k-means" or "association rules" or "recursive partitioning" or "discriminant analysis" or "feature selection" or ((linear or nonlinear or "non-linear" or logistic or ordinal or poisson or quantile or analysis) NEAR/1 (regression$ or model$)) or bioinformatic$ or ((progress* or regress* or recover* or respond* or response*) and (predict* or stratif*))) OR AB=("precision medicine" or "precision health" or "personalized medicine" or "personalized proteomics" or thera$nostic* or "tailored medicine" or "artificial intelligence" or "machine learning" or "deep learning" or algorithm$ or ((supervised or unsupervised or biased or unbiased or bayesian or hierarchical or neural or neuronal) NEAR/1 (cluster* or learning or learner$ or classifi* or network$)) or "k-nearest neighbo$r*" or "naive bayes" or (decision NEAR/1 (tree$ or forest$ or jungle$)) or "random forest$" or "gradient-boost*" or "support vector machine" or "k-means" or "association rules" or "recursive partitioning" or "discriminant analysis" or "feature selection" or ((linear or nonlinear or "non-linear" or logistic or ordinal or poisson or quantile or analysis) NEAR/1 (regression$ or model$)) or bioinformatic$ or ((progress* or regress* or recover* or respond* or response*) and (predict* or stratif*)))) AND
3. (TI=(Proteomic$ or proteome$ or metabolomic$ or metabolome$ or lipidomic$ or lipidome$ or "*inflammatory protein$" or "*inflammatory marker" or cytokine$ or interleukin$ or lymphokine$ or monokine$ or interferon$ or "colony stimulating factor$" or chemokine$ or "growth factor$" or "necrosis factor$" or "chemotactic protein$" or "adhesion molecule$" or "adhesion protein$" or "matrix metalloproteinase-2" or myeloperoxidase$ or "tissue inhibitor of metalloproteinase-2" or "macrophage inflammatory protein-1" or "brain-derived neurotrophic factor" or angiopoietin$ or ((hemoglobin or haemoglobin) NEAR/1 (a1c or glycated or glycosylated)) or hba1c or "c reactive protein" or "c-reactive protein" or crp or hscrp or "hs-crp" or ((protein or biomarker) and (concentration$ or level$ or quantif* or quantit* or mass spectrometry or iTRAQ or MALDI or SELDI or assay))) OR AB=(Proteomic$ or proteome$ or metabolomic$ or metabolome$ or lipidomic$ or lipidome$ or "inflammatory protein$" or "inflammatory marker" or cytokine$ or interleukin$ or lymphokine$ or monokine$ or interferon$ or "colony stimulating factor$" or chemokine$ or "growth factor$" or "necrosis factor$" or "chemotactic protein$" or "adhesion molecule$" or "adhesion protein$" or "matrix metalloproteinase-2" or myeloperoxidase$ or "tissue inhibitor of metalloproteinase-2" or "macrophage inflammatory protein-1" or "brain-derived neurotrophic factor" or angiopoietin$ or ((hemoglobin or haemoglobin) NEAR/1 (a1c or glycated or glycosylated)) or hba1c or "c reactive protein" or "c-reactive protein" or crp or hscrp or "hs-crp" or ((protein or biomarker) and (concentration$ or level$ or quantif* or quantit* or mass spectrometry or iTRAQ or MALDI or SELDI or assay))))

**Cochrane Central Register of Controlled Trials (CONTROL), Cochrane Database of Systematic Reviews**

1. ophth* or ocular or intraocular or eye* or retina* or macula* or fovea* or uvea* or sclera***** or cornea* or conjunctiva* or iris or "vitreous body" or "vitreous humo*r" or "vitreous fluid" or vitreo* or "aqueous humo*r" or "aqueous fluid" or tears or ((tear or lacrimal) NEXT fluid) or glaucoma or retinop* or retinoblastoma or uveitis or iritis or choroiditis or retinitis or chorioretinitis or conjunctivitis or endophthalmitis or cataract* or *opia or "optic atrophy" or "optic neuropathy" or vitrectomy or phacoemulsification or trabeculotomy or (paracentesis NEAR/3 "anterior chamber")
2. "precision medicine" or "precision health" or "personalized medicine" or "personalized proteomics" or thera*nostic* or "tailored medicine" or "artificial intelligence" or "machine learning" or "deep learning" or algorithm* or ((supervised or unsupervised or biased or unbiased or bayesian or hierarchical or neural or neuronal) NEXT (cluster* or learning or learner* or classifi* or network*)) or "k-nearest neighbo*r*" or "naive bayes" or (decision NEXT (tree* or forest* or jungle*)) or "random forest*" or "gradient-boost*" or "support vector machine" or "k-means" or "association rules" or "recursive partitioning" or "discriminant analysis" or "feature selection" or ((linear or nonlinear or "non-linear" or logistic or ordinal or poisson or quantile or analysis) NEXT (regression* or model*)) or bioinformatic* or ((progress* or regress* or recover* or respond* or response*) and (predict* or stratif*))
3. Proteomic* or proteome* or metabolomic* or metabolome* or lipidomic* or lipidome* or "*inflammatory protein*" or "*inflammatory marker*" or cytokine* or interleukin* or lymphokine* or monokine$ or interferon* or "colony stimulating factor*" or chemokine* or "growth factor*" or "necrosis factor*" or "chemotactic protein*" or "adhesion molecule*" or "adhesion protein*" or "matrix metalloproteinase-2" or myeloperoxidase* or "tissue inhibitor of metalloproteinase-2" or "macrophage inflammatory protein-1" or "brain-derived neurotrophic factor" or angiopoietin* or ((hemoglobin or haemoglobin) NEXT (a1c or glycated or glycosylated)) or hba1c or "c reactive protein" or "c-reactive protein" or crp or hscrp or "hs-crp" or ((protein or biomarker) and (concentration* or level* or quantif* or quantit* or mass spectrometry or iTRAQ or MALDI or SELDI or assay))
4. MeSH descriptor: [Ophthalmology]
5. MeSH descriptor: [Eye]
6. MeSH descriptor: [Tears]
7. MeSH descriptor: [Eye Diseases]
8. MeSH descriptor: [Vitrectomy]
9. MeSH descriptor: [Phacoemulsification]
10. MeSH descriptor: [Trabeculectomy]
11. MeSH descriptor: [Precision Medicine]
12. MeSH descriptor: [Theranostic Nanomedicine]
13. MeSH descriptor: [Artificial Intelligence]
14. MeSH descriptor: [Algorithms]
15. MeSH descriptor: [Neural Networks, Computer]
16. MeSH descriptor: [Decision Trees]
17. MeSH descriptor: [Regression Analysis]
18. MeSH descriptor: [Discriminant Analysis]
19. MeSH descriptor: [Proteomics]
20. MeSH descriptor: [Metabolomics]
21. MeSH descriptor: [Proteins] explode
22. MeSH descriptor: [Peptides]
23. MeSH descriptor: [Biomarkers]
24. concentration* or level* or quantif* or quantit* or mass spectrometry or iTRAQ or MALDI or SELDI or assay
25. (#21 or #22 or #23) and #24
26. MeSH descriptor: [Cytokines]
27. MeSH descriptor: [Cytokines]
28. MeSH descriptor: [Matrix Metalloproteinase 2]
29. MeSH descriptor: [Peroxidase]
30. MeSH descriptor: [Tissue Inhibitor of Metalloproteinase-1]
31. MeSH descriptor: [Tissue Inhibitor of Metalloproteinase-2]
32. MeSH descriptor: [Brain-Derived Neurotrophic Factor
33. MeSH descriptor: [Angiopoietins]
34. MeSH descriptor: [Anterior Eye Segment]
35. MeSH descriptor: [Anterior Capsule of the Lens]
36. MeSH descriptor: [Axial Length, Eye]
37. MeSH descriptor: [Pigment Epithelium of Eye]
38. MeSH descriptor: [Posterior Eye Segment]
39. MeSH descriptor: [Retina]
40. MeSH descriptor: [Sclera]
41. MeSH descriptor: [Tenon Capsule]
42. MeSH descriptor: [Uvea]
43. MeSH descriptor: [Asthenopia]
44. MeSH descriptor: [Cogan Syndrome]
45. MeSH descriptor: [Conjunctival Diseases]
46. MeSH descriptor: [Corneal Diseases]
47. MeSH descriptor: [Eye Abnormalities]
48. MeSH descriptor: [Eye Diseases, Hereditary]
49. MeSH descriptor: [Eye Hemorrhage]
50. MeSH descriptor: [Eye Infections]
51. MeSH descriptor: [Eye Injuries]
52. MeSH descriptor: [Eye Manifestations]
53. MeSH descriptor: [Eye Neoplasms]
54. MeSH descriptor: [Lens Diseases]
55. MeSH descriptor: [Ocular Hypertension]
56. MeSH descriptor: [Ocular Hypotension]
57. MeSH descriptor: [Optic Nerve Diseases]
58. MeSH descriptor: [Pupil Disorders]
59. MeSH descriptor: [Refractive Errors]
60. MeSH descriptor: [Retinal Diseases]
61. MeSH descriptor: [Scleral Diseases]
62. MeSH descriptor: [Uveal Diseases]
63. MeSH descriptor: [Vision Disorders]
64. MeSH descriptor: [Vitreous Detachment]
65. #1 or #4 or #5 or #6 or #7 or #8 or #9 or #10 or #34 or #35 or #36 or #37 or #38 or #39 or #40 or #41 or #42 or #43 or #44 or #45 or #46 or #47 or #48 or #49 or #50 or #51 or #52 or #53 or #54 or #55 or #56 or #57 or #58 or #59 or #60 or #61 or #62 or #63 or #64
66. #2 or #11 or #12 or #13 or #14 or #15 or #16 or #17 or #18
67. #3 or #19 or #20 or #25 or #26 or #27 or #28 or #29 or #30 or #31 or #32 or #33
68. #65 and #66 and #67

**Supplemental Table 1.** Objectives, rationale for selection of artificial intelligence methods, conclusions, and patient characteristics of included studies.

| **First Author, Publication Year** | **Study Objectives** | **Rational for Methodology Choice** | **Conclusion** | **Mean age ± SD** | **Sex (male/female)** | **Ocular comorbidities** | **Systemic comorbidities** | **Additional reported patient characteristics (e.g. ethnicity, medications)** |
| --- | --- | --- | --- | --- | --- | --- | --- | --- |
| **Acar**1**, 2020** | Identify metabolites associated with AMD. | PCA explored systematic differentiating factors between the cohorts, regressions estimated effect sizes. | Lipoprotein levels were associated with AMD-associated genetic variants and  decreased amino acids, and may point to nutritional deficiencies in AMD. There is  association between AMD-associated metabolites and  complement activation levels. | Overall: 74.22±7.9  ALIENOR: 83.19±4.2  EUGENDA-Nigmegen: 72.5±8.3  EUGENDA-Cologne: 75.18±9.1  CORRBI: 75.18±9.1  Rotterdam: 74.98±5.9 | Overall: 2783/3835  ALIENOR: 200/335  EUGENDA-Nigmegen: 731/1038  EUGENDA-Cologne: 620/908  CORRBI: 37/39  Rotterdam: 1110/1515 | AMD (2311) | Not detailed | Lipid lowering medications (not detailed) |
| **Arai**2**, 2020** | Construct a model for predicting treatment outcomes of anti-VEGF therapy for nAMD. | Used to identify which predictors were significantly associated with best-corrected visual acuity changes and the number of injections. | Aqueous humour protein concentrations may have predictive abilities of best-corrected visual acuity change over 12 months and the number of injections in treatment of exudative nAMD. | 72.9 | Not detailed | Not detailed | Not detailed | Not detailed |
| **Boekhoorn**3**, 2007** | Examine CRP as a risk factor for AMD. | Compute hazard ratios and confidence intervals. | Elevated baseline CRP was associated with the development of early and late AMD. | No AMD: 66.7±7.7  Early incident AMD: 68.2±7.6  Late incident AMD: 72.0±6.5 | No AMD: 1631/2315  Early incident AMD: 246  Late incident AMD: 42/55 | Not detailed | Diabetes mellitus (412) | Smoker (1038), former smoker (1988) |
| **Buch**4**, 2005** | Examine the association between risk factors and the 14-year incidence of AMD. | Univariate regression calculated odds ratios.  Multivariate logistic regression ensured that the number of explanatory variables included was adjusted to the number of events. | There is a correlation between age, cataract, family history, alcohol consumption, apolipoproteins A1 and B and the incidence of AMD. | 82.4±4.63  No AMD, early AMD, late AMD:  60- 64 (57, 37, 8)  65-69 (46, 40, 12)  60-74 (29, 21, 19)  75-80 (6,13, 13) | No AMD: 56/82  Early AMD: 37/74  Late AMD: 16/36 | Xanthelasmata (18), corneal arcus (98), hyperopia (138), cataract (68), cataract extraction (69) | HTN (199), angina pectoris (112), diabetes (3) | Iris colour, family history of AMD (30), smoker or former smoker (208), alcohol consumption, physical activity, education, income, Ca+ agonists (13), benzodiazapenes (47), neurleptics (9), antocoagulants/salicylates (56), multivitamins (141), antioxidants (19) |
| **Chaker**5**, 2015** | Examine relationship between thyroid function and AMD. | Calculate association between thyroid markers and risk of incident AMD. | Higher free thyroxine is associated with increased risk of AMD. | No AMD: 67.6 ± 7.6  Incident AMD: 67.9 ± 7.1 | No AMD: 2022/2746  Incident AMD: 340/465 | Not detailed | No AMD: diabetes (10.8%), hypertension (63%)  Incident AMD: diabetes (10.8%), hypertension (63%) | No AMD: BMI (26.9 ± 3.9), smoking (20.7%), TSH mIU/L median, IQR (1.78, 1.15 - 2.69)  Incident AMD: BMI (26.6 ± 3.7), smoking (21.0%), TSH mIU/L median, IQR (1.73, 1.17 - 2.67) |
| **Cougnard-Gregoire**6**, 2014** | Explore the association of AMD with plasma lipid levels and lipid-lowering medication use. | Regression models determined associations of early and late AMD with plasma lipid variables, statin and fibrate drug use. | Elderly patients with high HDL levels may be at increased risk for AMD, and HDL dysfunction might be implicated in AMD pathogenesis. | 80.2 | 367/596 | Glaucoma, cataract, dry eye syndrome (quantities not specified) | HTN, cardiovascular disease, diabetes (quantities not specified) | Smoking, educational level, statin use, fibrate use (quantities not specified) |
| **Gao**7**, 2020** | Examine serum metabolic profile in patients with nAMD and analyze response to anti-VEGF therapy during the initial treatment phase. | OPLS-DA was used to identify differentiating features between treatment responders and non-responders.  PCA selected metabolites which are the most responsible for the differentiation between groups. | Expression of glycerophosphocholine, LysoPC (18:2) and PS (18:0/20:4) were higher in non-responders, implicating that reductions in these metabolites can be used as predictors for responsiveness to anti-VEGF therapy. | Test set:  Responder: 73.3 (69.8–76.8)  Non-responder: 73.7 (69.2–78.2)  Validation set:  Responder: 72.2 (68.6–75.8)  Non-responder: 70.7 (67.3–74.1) | Test set:  Responder: 15/14  Non-responder: 13/8  Validation set:  Responder: 16/9  Non-responder: 13/12 | Test set:  Responder: lesion type, PCV (16)  Non-responder: : lesion type, PCV (10)  Validation set:  Responder: Lesion type, PCV (25)  Non-responder: lesion type, PCV (25) | Test set:  Responder: IHD (3), Stroke (4), diabetes (11), hyperlipidemia (18), HTN (20)  Non-responder: IHD (0), Stroke (3), diabetes (3), hyperlipidemia (13), HTN (13)  Validation set:  Responder: IHD (2), Stroke (1), diabetes (9), hyperlipidemia (18), HTN (15)  Non-responder: IHD (3), Stroke (0), diabetes (6), hyperlipidemia (15), HTN (20) | Test set:  Responder: bevacizumab (21), ranibizumab (1), afibercept (7)  Non-responder: bevacizumab (20), ranibizumab (0), afibercept (1)  Validation set:  Responder: bevacizumab (25), ranibizumab (0) afibercept (-)  Non-responder: bevacizumab (25), ranibizumab (0), afibercept (-) |
| **Han**8**, 2020** | Assess metabolomic alterations in AMD to provide insights into its pathogenesis | PCA grouped samples and outliers.  OPLS-DA maximized the variation between the wAMD and control group.  KEGG identified the biological pathways affected by wAMD. | Metabolic dysfunction in AMD is mitochondrial-centered and may provide new insights into novel therapeutic strategies. | Controls: 69.6  wAMD: 74.12 | Controls: 14/6  wAMD: 14/12 | Cataract (20 controls) | HTN (8 control, 13 wAMD), hyperlipidemia (2 control, 2 wAMD), cerebral infarction (1 control, 6 wAMD), CAD (2 control, 6 wAMD) | Alcohol use (1 control, 3 wAMD), smokers (2 control, 7 wAMD) |
| **Joachim**9**, 2015** | Assess incidence and progression of drusen and associated risk factors. | Regression determined independent risks of variables in drusen development. | Older age and genetic risk factors are associated with the development of medium drusen. | Without incident drusen: 62.1±8.1  With incident drusen: 62.3±7.5 | Without incident drusen: 54.7% female  With incident drusen: 59.4% female | Not detailed | Not detailed | (w/o incident drusen, with incident drusen);  Current smoker (14.8%, 9.5%), past smoker (37.3%, 28.7%), average blood pressure (143.4/83.2, 144.6/83.8), >1 serving of fish per week (60.3, 60.2), no alcohol consumption (29.6, 31.6), antioxidant supplementation (36.1%, 35.2%), zinc supplementation (16.9%, 11.6%), mean dietary lutein and zeaxanthin intake in ug (0.8, 0.8) |
| **Jonasson**10**, 2014** | Investigate the incidence, progression, and risk factors of AMD. | Examine the association between measured characteristics and AMD. | Age, smoking, plasma HDL-cholesterol, BMI, and female sex are associated with AMD. Elevated HDL- cholesterol is associated with GA development. | 74.7±4.8 | 1217/1651 | Diabetes (284), HTN (2253) | Early AMD (563), late AMD (109) | Cod liver oil use (1688), former smoker (1306), current smoker (315) |
| **Kersten**11**, 2019** | Explore novel biomarkers for AMD using a targeted metabolomics. | sPLS-DA used for variable selection and  dimension reduction  Regression used to reduce shrinkage bias in selected predictors from the sPLS-DA | Metabolomics can identify biomarker candidates for AMD, and glutamine level is elevated in early AMD. | Cases: 72.65±7.30  Controls: 70.64±5.2 | AMD: 26/46  Controls: 28/44 | Diabetes (self reported by <10% of participants) | Non-advanced AMD | Not detailed |
| **Klein**12**, 2019** | To examine the relationship between serum oxidized low-density lipoprotein cholesterol and the incidence of AMD. | Regression compared baseline characteristics.  Multi-state Markov used to evaluate the associations of known and potential risk factors with the incidence, worsening, and improvement of AMD. | There is no relationship between ox-LDL and AMD development or progression. | 62.0±11.2 | 2163/2763 | HTN (2488), CVD (733), diabetes (529) | Cataract (1354), AMD (1017) | Smoker (969), lipid lowering medications (221), statins (25) |
| **Kuiper**13**, 2017** | Identify high risk of AMD using metabolic biomarkers. | Clustering used to group significant biomarkers.  k-nearest neighbors evaluated the validity of the projection  Decision tree created a predictive clinical model. | Molecular profiling can be a diagnostic aid in ophthalmology. | Discovery cohort: 66 (25-95)  Replication cohort: 66 (11-86) | Discovery cohort: 65/63  Replication cohort: 25/22 | Not detailed | AMD (Discovery 32, Replication 7), PVRL (Discovery 18, Replication 7), INIU (Discovery 26, Replication 9), RRD (Discovery 52, Replication 13) | Not detailed |
| **Lai**14**, 2009** | To evaluate the visual and growth factor changes given intravitreal bevacizumab dosages in nAMD. | Regression used to determine the relative contribution of each variable. | 1.25-mg bevacizumab injection seems to  result in better visual outcome than 2.5 mg, baseline VEGF may predict angiographic response. | Overall: 75.8±7.4 1.25 mg  Bevacizumab: 75.9±6.6  2.5 mg Bevacizumab: 74.9±7.7 | Overall: 34/16  1.25 mg eyes: 16/8  2.5 mg eyes: 718/8 | Not detailed | Not detailed | Not detailed |
| **Lains**15**, 2018** | To characterize the metabolomic profile of patients with AMD. | PCA used for dimensionality reduction.  Regression used to isolate metabolites significantly associated with AMD. | AMD patients had altered plasma metabolomic profiles, with most significant metabolites mapping to the glycerophospholipid pathway. | Overall: 70±8  Controls: 68 ± 10  Early AMD: 68 ± 7  Intermediate AMD: 70 ± 5  Late AMD: 76 ± 8 | Overall: 43/76  Controls: 12/18  Early AMD: 9/20  Intermediate AMD: 9/21  Late AMD: 13/17 | Not detailed | Overall: choroidal neovascularization, wAMD (25), GA (4) | Overall: BMI (27 ± 5), White (101), Black/Hispanic/Asian (7), non-smoker (57), former smoker (56), smoker (3) |
| **Laíns**16**, 2019** | To examine plasma metabolic profiles for varying severities of AMD. | PCA used for dimensionality reduction and to visualize the overall patterns.  Regression used to identify plasma metabolites associated with AMD status. | The discovered metabolites are potential biomarkers for AMD. | Boston, USA cohort -  Control: 67.8±8.5 Early AMD: 68.5±7.1 Intermediate AMD: 72.4±6.9 Late AMD: 76.1±8.2  Coimbra, Portugal cohort - Control: 68.6±5.0 Early AMD: 71.2±6.1 Intermediate AMD: 76.6±7.5 Late AMD: 81.8±6.9 | Boston, USA cohort -  Control: 18/29  Early AMD: 12/23  Intermediate AMD: 19/45  Late AMD: 21/29  Coimbra, Portugal cohort -  Control: 18/35  Early AMD: 23/25  Intermediate AMD: 40/90  Late AMD: 22/32 | Not detailed | AMD | Majority of participants were white for both control and AMD groups (>90% for all groups) |
| **Luo**17**, 2017** | Examine metabolic characteristics in wAMD. | PLS-DA and PCA determined which metabolites varied between groups which were visualized with clustering.  KEGG determined relevant pathways. | Metabolic profiles and pathways differ between wAMD  and controls. | wAMD: 66.20±11.51 Controls: 64.70±11.60 | wAMD: 11/9  Controls: 11/9 | Hypertension (9 wAMD, 8 controls) CAD (2 wAMD, 1 control), hyperlipidemia (3 wAMD, 2 controls) | wAMD | All participants were Chinese and long-term residents of China |
| **Lynch**18**, 2019** | Explore proteomic profiles in neovascular AMD and GA. | Pathway analysis used for functional class scoring of pathways.  Regression compared AMD to controls. | Identified biomarkers reflect systemic  alterations in protein expression. | AMD: 80.5 ± 6.4  GA: 82.3 ± 5.4  Cataract controls: 78.8 ± 6.0 | AMD: 4/6  GA: 7/3  Cataract controls:  5/5 | AMD: Treated hypertension (8), kidney disease (2), cardiac disease (4)  GA: Treated hypertension (6), kidney disease (1), cardiac disease (8)  Cataract vontrols: Treated hypertension (7), kidney disease (1), cardiac disease (7) | AMD: Ocular hypertension (2), cataract (4), pseudophakic (5), pseudophakic (1)  GA: Ocular hypertension (2), cataract (2), pseudophakic (8)  Cataract controls: Pseudophakic (8), pseudophakic (2) | AMD: 100% Caucasian, 5 former smokers, BMI 26.2 ± 5.1  GA: 100% Caucasian, 8 former smokers, BMI 26.6 ± 2.5  Cataract controls: 90% Caucasian, 4 former smokers, BMI 26.8 ± 5.9 |
| **Lynch**19**, 2020** | Determine a difference in proteomic profiles between AMD patients with and without reticular pseudodrusen, and if proteomic profile can determine conversion to advanced AMD. | Logistic regression used to calculate odds ratio.  Cox regression used to model each aptamer to quantify the time to conversion.  Pathway analysis identified relevant pathways. | Reticular pseudodrusen and patients that convert to advanced AMD have a distinct proteomic profile. | Reticular pseudodrusen: 78±7.1  No reticular pseudodrusen: 76±6.7 | Reticular pseudodrusen: 14/25  No reticular pseudodrusen: 21/49 | Reticular pseudodrusen: T2DM (5), treated HTN (29), kidney disease (8), stroke (0), PVD (5), atrial fibrilation (2), cardiac disease (17)  No reticular pseudodrusen: T2DM (10), treated HTN (36), kidney disease (7), stroke (6), PVD (9), atrial fibrilation (5), cardiac disease (27) | Not detailed | All non-Hispanic White patients  Reticular pseudodrusen: BMI (26.2 ± 4.6), never smoked (16), current smoker (1), former smoker (22)  No reticular pseudodrusen: BMI (26.4 ± 5.1), never smoked (37), current smoker (1), former smoker (32) |
| **Mendez**20**, 2021** | Analyze association between metabolite levels and dark adaptation in AMD. | Not detailed | Fatty acid-related lipids and amino acids are associated with dark adaptation, suggesting that oxidative stress and mitochondrial dysfunction play a role in AMD development. | Control: 65.7±7.8  Early AMD: 66.1±9.3  Intermediate AMD: 70.4±5.4  Late AMD: 71.4±6.9 | Control: 10/8  Early AMD: 5/8  Intermediate AMD: 12/19  Late AMD: 2/7 | Not detailed | AMD, reticular pseudodrusen  Control: 2 reticular pseudodrusen  Early AMD: 5 reticular pseudodrusen  Intermediate AMD: 24 reticular pseudodrusen  Late AMD: 4 reticular pseudodrusen | Control: 16 white, 1 hispanic, 1 black, 1 smoker, 9 ex-smokers, 1 AREDS formulation supplementation, 26.2±3.8 BMI  Early AMD: 10 white, 2 hispanic, 1 asian, 4 ex-smokers, 1 AREDS formulation supplementation, 26.7±4.7 BMI  Intermediate AMD: 31 white, 1 smoker, 17 ex-smokers, 25 AREDS formulation supplementation, 28±4.3 BMI  Late AMD: 7 white, 2 hispanic, 1 smoker, 17 ex-smokers, 7 AREDS formulation supplementation, 29.6±5.3 BMI |
| **Millen**21**, 2015** | Examine the relationship between vitamin D, genetics, and AMD. | Estimate age-adjusted odds ratios for AMD by vitamin D and genetic status. | The odds of AMD were highest in those with deficient vitamin D status. | Vitamin D adequate 1: 65.8±0.4  Vitamin D adequate 2: 66.0±0.3  Vitamin D inadequate 1: 66.9±0.3  Vitamin D inadequate 2: 66.1±0.5 | 0/913 | Vitamin D adequate 1: HTN (42), CVD (37), diabetes (2)  Vitamin D adequate 2: HTN (85), CVD (72), diabetes (10)  Vitamin D inadequate 1: HTN (66), CVD (67), diabetes (6)  Vitamin D inadequate 1: HTN (31), CVD (17), diabetes (3) | Not detailed | Vitamin D adequate 1: White (174), income over 75k (48), college education (78), post-college education (60), non-smoker (103), non-drinker (62), blue iris (74), family history of AMD (33), BMI <22.5 (48), no history of hormone replacement (36)  Vitamin D adequate 2: White (367), income over 75k (67), college education (184), post-college education (112), non-smoker (213), non-drinker (128), blue iris (150), family history of AMD (63), BMI <22.5 (69), no history of hormone replacement (117)  Vitamin D inadequate 1: White (267), income over 75k (41), college education (136), post-college education (66), non-smoker (151), non-drinker (113), blue iris (124), family history of AMD (38), BMI <22.5 (25), no history of hormone replacement (81)  Vitamin D inadequate 2: White (82), income over 75k (10), college education (40), post-college education (16), non-smoker (46), non-drinker (41), blue iris (33), family history of AMD (10), BMI <22.5 (8), no history of hormone replacement (34) |
| **Millen**22**, 2016** | Investigated the association between vitamin D status and early AMD. | Estimate the odds  ratios and confidence intervals for AMD by vitamin D status. | Vitamin D status was not associated with early AMD. | Deficient (<30 nmol/L): 55±5.5  Inadequate (30 to < 50 nmolL): 56±5.6  Adequate (50 to <75 nmolL): 57±5.7  Adequate (>75 nmol/L): 57±5.7 | Deficient (<30 nmol/L): 107/358  Inadequate (30 to < 50 nmolL): 826/1604  Adequate (50 to <75 nmolL): 2312/2314  Adequate (>75 nmol/L): 1218/1184 | Deficient (<30 nmol/L): HTN (198), CAD (15), stroke (10)  Inadequate (30 to < 50 nmolL): HTN (961), CAD (129), stroke (40)  Adequate (50 to <75 nmolL): HTN (1446), CAD (235), stroke (75)  Adequate (>75 nmol/L): HTN (663), CAD (137), stroke (26) | Deficient (<30 nmol/L): Soft drusen (464), RPE depigmentation (2784), early AMD (23)  Inadequate (30 to < 50 nmolL): Soft drusen (2418), RPE depigmentation (4263), early AMD (112)  Adequate (50 to <75 nmolL): Soft drusen (4390), RPE depigmentation (2290), early AMD (237)  Adequate (>75 nmol/L): Soft drusen (2385), early AMD (139) | Deficient (<30 nmol/L): Never smoked (210), never drank alcohol (134), obese (198), never used estrogen (211)  Inadequate (30 to < 50 nmolL): Never smoked (1023), never drank alcohol (134), obese (957), never used estrogen (946)  Adequate (50 to <75 nmolL): Never smoked (1871), never drank alcohol (908), obese (1233), never used estrogen (1235)  Adequate (>75 nmol/L): Never smoked (905), never drank alcohol (447), obese (388), never used estrogen (486) |
| **Mitchell**23**, 2018** | To identify metabolites and pathways altered in nAMD. | Training set used to identify potential  discriminating metabolites and test set was used to determine how well  metabolites could differentiate between nAMD  patients and controls  Linear models for microarray data, variable importance for projection based on PLS-DA and SVM-RFE first found differentiating metabolites.  Pathway analysis and cluster analysis visualized the relationship between discriminating  metabolite values and case-control status. | The carnitine shuttle pathway is significantly increased in nAMD patients compared to controls, indicating fatty acid metabolism involvement in nAMD development. | Controls: 71.9  nAMD: 79.2 | Controls: 59/133  nAMD: 35/65 | Control: Diabetes (35), HTN (99), hyperlipidemia (103)  nAMD: Diabetes (23), HTN (61), hyperlipidemia (49) | Not detailed | Control: Smokers (95)  nAMD: Smokers (61) |
| **Ngai**24**, 2011** | To determine the prevalence of ARM and AMD in men aged 65–83 years. | Logistic regression analysis to estimate the odds ratio as a proxy for the risk ratio.  Multivariable analyses adjusted for age, social class, lifestyle variables, metabolic factors, inflammatory factors. | There are opportunities for screening and secondary prevention interventions to prevent progression of the disease and blindness. | 71.1±4.2 | 934/0 | Not detailed | Not detailed | Never smoked (191), >60 alcohol units drank per week (220) |
| **Nielsen**25**, 2018** | Investigate markers of chronic inflammation in patients with GA and their association with the rate of GA progression. | Evaluated the association between plasma markers and rate of GA. | Markers of chronic inflammation are associated with presence of GA secondary to AMD. Plasma IL-6 can predict progression of GA, and is the first known plasma biomarker of disease activity in GA. | GA: 80.5 (74.0–87.0)  Healthy: 76.0 (72.0–82.0)  nAMD: 77.0 (72.0–81.0) | GA: 14/28  Healthy: 14/13  nAMD: 19/22 | GA: HTN (25), hypercholesterolemia (15), CVD (15), type 2 diabetes (5)  Healthy: HTN (9), hypercholesterolemia (9), CVD (4)  nAMD: HTN (21), hypercholesterolemia (11), CVD (11), type 2 diabetes (5) | GA, AMD | GA: Never smoked (16), daily exercise (27)  Healthy: Never smoked (18), daily exercise (18)  nAMD: Never smoked (11), daily exercise (21) |
| **Osborn**26**, 2013** | Differentiate between controls and neovascular AMD patients using plasma metabolic profile. | PCA, PLS-DA identified metabolic features to distinguish AMD patients from controls.  SVM tested the models, pathway analysis identified relevant pathways. | Metabolomic analysis can identify metabolites to distinguish between neovascular AMD and controls. | AMD patients: 76.0±5.7  Controls: 76.4±4.8 | Did not differ significantly between groups (p=0.07) | Did not differ significantly in diabetes, CAD, HTN, hyperlipidemia, history of cancer | nAMD | Caucasian (all), did not differ significantly in smoking status, multivitamin supplement intake, |
| **Robman**27**, 2007** | Determine association between Chlamydia pneumoniae infection and AMD development. | Adjusted for age and smoking status. | There is no association between C. pneumoniae antibodies and early AMD | Prevalent AMD: 74.8±7.90 (early AMD: 74.7±7.66, late AMD: 76.3±8.33)  Prevalent controls: 72.8±8.10  Incident controls: 76.7±6.24 | Prevalent AMD: 80/117 (early AMD: 65/94, late AMD: 15/23)  Prevalent Controls: 181/252  Incident early AMD: 36/51  Incident late AMD: 10/12  Incident Controls: 99/162 | Not detailed | Not detailed | Prevalent AMD: Current or former smoker (121)  Prevalent Early AMD: Current or former smoker (94)  Prevalent Late AMD: Current or former smoker (27)  Prevalent Controls: Current or former smoker (265)  Incident Early AMD: Current or former smoker (56)  Incident Late AMD: Current or former smoker (15)  Incident Controls: Current or former smoker (141) |
| **Robman**28**, 2010** | Determine effect of CRP and complement factor H on AMD progression. | Adjusted for age, smoking, anti-inflammatory medications, and the CC genotype of the CFH gene | CRP levels and CFH genotype increased risk for late AMD and AMD progression. | Case-control:  AMD: 74.1±7.2  Controls: 72.8±7.1  Cohort: AMD progression: 76.0±7.4  AMD stable: 73.1±7.2 | Case-control:  103/119  Cohort: 331/294 | Not detailed | Not detailed | Controls: Former or current smoker (115), use of anti-inflammatory meds (36)  AMD: Former or current smoker (130), use of anti-inflammatory meds (51) |
| **Sato**29**, 2018** | Investigate association of aqueous humor cytokines with the pathogenesis of nAMD, and evaluate cytokine changes before and after initiation of therapy in nAMD. | Examine the association of cytokines with the pathogenesis of nAMD. | VEGF, IP-10 and IL-6 play crucial roles in  the pathophysiology and pathogenesis of nAMD, and intravitreal injections decreases intraocular VEGF but increase IP-10 and IL-6. | Cataract controls:  73.7±9.43  nAMD: 69.0±10.2 | Cataract controls:  6/11  nAMD: 15/6 | Not detailed | Cataract (17)  nAMD group (21): CNV type 1 (5), CNV type 2 (9) PCV (8) | Not detailed |
| **Sato**30**, 2019** | Evaluate the role of cytokines in AMD development. | Examined associations of  inflammatory cytokines with AMD, PCA, EFA.  Cluster analysis summarized individual factors to groups with similar properties. | Low-grade inflammation could be a contributor in neovascular AMD. | 75 (46-94) | 41/21 | Not detailed | nAMD, PCV, retinal angiomatous proliferation | Not detailed |
| **Schori**31**, 2018** | Identify specific biomarkers for dry AMD. | GO analyzed differentially regulated proteins.  Cluster analysis grouped similar properties. | The pathways detailed contribute to defining dry AMD. | Dry AMD: 80.3±6.6  nAMD: 80.8±6.2  PDR: 59.3±14.4  ERM: 70.1± 4.1 | Dry AMD: 1/5  nAMD: 4/6  PDR: 5/4  ERM: 4/5 | Not detailed | Dry AMD: Cataract surgery (6)  nAMD: Cataract surgery (7), vitrectomy (3)  PDR: Cataract surgery (4), vitrectomy (6)  ERM: Cataract surgery (1), vitrectomy (8) | nAMD group: anti-VEGF treatment (10)  PDR group: anti-VEGF treatment (5) |
| **Subhi**32**, 2019** | Investigate whether the proportion of CD11b+ circulating monocytes is associated with the number of anti-VEGF nAMD and PCV. | Determined association between the proportion of CD11b+ monocytes and anti-VEGF treatments. | Circulating CD11b+ monocytes were correlated with the number of anti-VEGF injections in patients with nAMD and PCV. | 76±7 | 37/44 | Not detailed | Choroidal neovascularization (41 occult, 25 classic, 15 PCV), nAMD | Ranibizumab (49), aflibercept (32) |
| **Ueda-Consolvo**33**, 2017** | Assess relationship between endothelial dysfunction and frequency of anti-VEGF treatment in nAMD. | Assess associations between the systemic and ocular characteristics and the number of treatments. | Endothelial dysfunction may affect the efficacy of anti-VEGF therapy. | 76.0±7.6 | 49/15 | HTN 33, diabetes mellitus (8) | AMD (all) | BMI: 23.0±2.6, all Japanese, smoking (43)  ranibizumab (10 ), afibercept (44) |
| **Vanderbeek**34**, 2013** | Determine if statins are associated with AMD development or progression. | Assess association between statins and AMD development | Elevated lipid levels and >1 year of statin use are associated with exudative AMD risk. Lipid status influences the relationship between statins and AMD risk. | All >60 years  Statin users: 67.9  Non-statin users: 68.5 | Not detailed | Not detailed | Not detailed | Statin use (all) |
| **Yao**35**, 2013** | Identify the possible mechanisms that lead to the development of wAMD. | GO used to identify proteins and their function or pathway. | AH composition was different between wAMD and non-AMD patients, and the identified proteins could be used as a biomarker for wAMD as they may play a role in pathogenesis. | wAMD: 56.17±9.28  Cataract control: 57.5±2.95 | wAMD: 3/3  Cataract control: 3/3 | Not detailed | Cataract (all) | Not detailed |
| **Yi**36**, 2020** | Characterize cytokines in aqueous humour of common macular diseases during intravitreal anti-VEGF therapy. | Compare cytokines among the retinal diseases while adjusting for age and gender. | Rate of cytokine production and response to intravitreal anti-VEGF is disease-dependent. A combination therapy using both anti-VEGF and anti-inflammatory therapeutics may be superior to single anti-VEGF therapy. | 56±14 | 76/68 | Not detailed | CRVO (21), DME (22), BRVO (34), nAMD (35), pmCNV (32) | Not detailed |
| **Yip**37**, 2015** | Examine relationship between cardiovascular risk factors and AMD. | Examine the effect of detected risk factors on AMD. | CRP and HDL-C were associated with increased odds of AMD development. | At baseline :  67.4 (44-91) | At baseline: 259/414 | Not detailed | AMD (all) | At baseline -  AMD: Inactive (153), current or former smoker (307), A level education (282), non-manual labourer (228)  No AMD: Inactive (984), current or former smoker (2164), A level education (2111), non-manual labourer (3050) |

**Abbreviations**: AMD = age-related macular degeneration, AI=artificial intelligence, PCA=principal component analysis, nAMD=neovascular age-related macular degeneration, PCV= polypoidal Choroidal Vasculopathy, CRP=c reactive protein, OPLS-DA= Orthogonal Projections to Latent Structures Discriminant Analysis, wAMD=wet age-related macular degeneration, KEGG= Kyoto Encyclopedia of Genes and Genomes, GA=geographic atrophy, sPLS-DA= Sparse Partial Least Squares Discriminant Analysis, SMOTE= Synthetic Minority Oversampling Technique, EFA= exploratory factor analysis, PDR = proliferative diabetic retinopathy, ERM=epiretinal membrane, GO=gene ontology, CRVO=central retinal vein occlusion, DME=diabetic macular edema, pmCNV= pathologic myopia associated choroidal neovascularization, HTN=hypertension, VEGF=vascular endothelial growth factor, IHD=ischemic heart disease, PVRL= primary vitreoretinal lymphoma, INUI= idiopathic non-infectious uveitis, RRD= rhegmatogenous retinal detachment , CAD=coronary artery disease, CVD=cardiovascular disease, CNV= choroidal neovascularization

1. Acar İE, Lores-Motta L, Colijn JM, et al. *Integrating Metabolomics, Genomics, and Disease Pathways in Age-Related Macular Degeneration: The EYE-RISK Consortium*. Vol 127.; 2020. doi:10.1016/j.ophtha.2020.06.020

2. Arai Y, Takahashi H, Inoda S, et al. Aqueous humour proteins and treatment outcomes of anti-VEGF therapy in neovascular age-related macular degeneration. *PLoS One*. 2020;15(3):1-14. doi:10.1371/journal.pone.0229342

3. Boekhoorn SS. C-reactive Protein Level and Risk of Aging Macula Disorder. *Arch Ophthalmol*. 2007;125(10):1396. doi:10.1001/archopht.125.10.1396

4. Buch H, Vinding T, la Cour M, Jensen GB, Prause JU, Nielsen N V. Risk factors for age-related maculopathy in a 14-year follow-up study: The Copenhagen City Eye Study. *Acta Ophthalmol Scand*. 2005;83(4):409-418. doi:10.1111/j.1600-0420.2005.00492.x

5. Chaker L, Buitendijk GHS, Dehghan A, et al. Thyroid function and age-related macular degeneration: A prospective population-based cohort study - the Rotterdam Study. *BMC Med*. 2015;13(1):1-8. doi:10.1186/s12916-015-0329-0

6. Cougnard-Grégoire A, Delyfer MN, Korobelnik JF, et al. Elevated high-density lipoprotein cholesterol and age-related macular degeneration: The Alienor study. *PLoS One*. 2014;9(3). doi:10.1371/journal.pone.0090973

7. Gao Y, Teo YCK, Beuerman RW, Wong TY, Zhou L, Cheung CMG. A serum metabolomics study of patients with nAMD in response to anti-VEGF therapy. *Sci Rep*. 2020;10(1):1-10. doi:10.1038/s41598-020-58346-3

8. Han G, Wei P, He M, Teng H, Chu Y. Metabolomic Profiling of the Aqueous Humor in Patients with Wet Age-Related Macular Degeneration Using UHPLC-MS/MS. *J Proteome Res*. 2020;19(6):2358-2366. doi:10.1021/acs.jproteome.0c00036

9. Joachim NDL, Mitchell P, Kifley A, Jinwang J. Incidence, progression, and associated risk factors of medium drusen in age-related macular degeneration findings from the 15-year follow-up of an Australian cohort. *JAMA Ophthalmol*. 2015;133(6):698-705. doi:10.1001/jamaophthalmol.2015.0498

10. Jonasson F, Fisher DE, Eiriksdottir G, et al. Five-year incidence, progression, and risk factors for age-related macular degeneration: The age, gene/environment susceptibility study. *Ophthalmology*. 2014;121(9):1766-1772. doi:10.1016/j.ophtha.2014.03.013

11. Kersten E, Dammeier S, Ajana S, et al. Metabolomics in serum of patients with non-advanced age-related macular degeneration reveals aberrations in the glutamine pathway. *PLoS One*. 2019;14(6):1-12. doi:10.1371/journal.pone.0218457

12. Klein R, Lee KE, Tsai MY, Cruickshanks KJ, Gangnon RE, Klein BEK. Oxidized Low-density Lipoprotein and the Incidence of Age-related Macular Degeneration. *Ophthalmology*. 2019;126(5):752-758. doi:10.1016/j.ophtha.2018.12.026

13. Kuiper JJW, Beretta L, Nierkens S, et al. An Ocular Protein Triad Can Classify Four Complex Retinal Diseases. *Sci Rep*. 2017;7:1-9. doi:10.1038/srep41595

14. Lai TYY, Liu DTL, Chan KP, Luk FOJ, Pang CP, Lam DSC. Visual outcomes and growth factor changes of two dosages of intravitreal bevacizumab for neovascular age-related macular degeneration: A randomized, controlled trial. *Retina*. 2009;29(9):1218-1226. doi:10.1097/IAE.0b013e3181b32c45

15. Laíns I, Kelly RS, Miller JB, et al. Human Plasma Metabolomics Study across All Stages of Age-Related Macular Degeneration Identifies Potential Lipid Biomarkers. *Ophthalmology*. 2018;125(2):245-254. doi:10.1016/j.ophtha.2017.08.008

16. Laíns I, Chung W, Kelly RS, et al. Human Plasma Metabolomics in Age-Related Macular Degeneration: Meta-Analysis of Two Cohorts. *Metabolites*. 2019;9(7):127. doi:10.3390/metabo9070127

17. Luo D, Deng T, Yuan W, Deng H, Jin M. Plasma metabolomic study in Chinese patients with wet age-related macular degeneration. *BMC Ophthalmol*. 2017;17(1):1-9. doi:10.1186/s12886-017-0555-7

18. Lynch AM, Wagner BD, Weiss SJ, et al. Proteomic profiles in advanced age-related macular degeneration using an aptamer-based proteomic technology. *Transl Vis Sci Technol*. 2019;8(1). doi:10.1167/tvst.8.1.14

19. Lynch AM, Wagner BD, Palestine AG, et al. Plasma biomarkers of reticular pseudodrusen and the risk of progression to advanced age-related macular degeneration. *Transl Vis Sci Technol*. 2020;9(10):1-13. doi:10.1167/tvst.9.10.12

20. Mendez KM, Kim J, Laíns I, et al. Association of human plasma metabolomics with delayed dark adaptation in age-related macular degeneration. *Metabolites*. 2021;11(3):1-13. doi:10.3390/metabo11030183

21. Millen AE, Meyers KJ, Liu Z, et al. Association between vitamin D status and age-related macular degeneration by genetic risk. *JAMA Ophthalmol*. 2015;133(10):1171-1179. doi:10.1001/jamaophthalmol.2015.2715

22. Millen AE, Nie J, Sahli MW, et al. Vitamin D status and prevalent early age-related macular degeneration in African Americans and Caucasians: The Atherosclerosis Risk in Communities (ARIC) Study. *J Nutr Health Aging*. 2017;21(7):772-780. doi:10.1007/s12603-016-0827-6

23. Mitchell SL, Uppal K, Williamson SM, et al. The carnitine shuttle pathway is altered in patients with neovascular age-related macular degeneration. *Investig Ophthalmol Vis Sci*. 2018;59(12):4978-4985. doi:10.1167/iovs.18-25137

24. Ngai LY, Stocks N, Sparrow JM, et al. The prevalence and analysis of risk factors for age-related macular degeneration: 18-year follow-up data from the Speedwell eye study, United Kingdom. *Eye*. 2011;25(6):784-793. doi:10.1038/eye.2011.56

25. Nielsen MK, Subhi Y, Molbech CR, Falk MK, Nissen MH, Sørensen TL. Systemic levels of interleukin-6 correlate with progression rate of geographic atrophy secondary to age-related macular degeneration. *Investig Ophthalmol Vis Sci*. 2019;60(1):202-208. doi:10.1167/iovs.18-25878

26. Osborn MP, Park Y, Parks MB, et al. Metabolome-Wide Association Study of Neovascular Age-Related Macular Degeneration. *PLoS One*. 2013;8(8). doi:10.1371/journal.pone.0072737

27. Robman L, Mahdi OS, Wang JJ, et al. Exposure to Chlamydia pneumoniae infection and age-related macular degeneration: The blue mountains eye study. *Investig Ophthalmol Vis Sci*. 2007;48(9):4007-4011. doi:10.1167/iovs.06-1434

28. Robman L, Baird PN, Dimitrov PN, Richardson AJ, Guymer RH. C-reactive protein levels and complement factor H polymorphism interaction in age-related macular degeneration and its progression. *Ophthalmology*. 2010;117(10):1982-1988. doi:10.1016/j.ophtha.2010.02.003

29. Sato T, Takeuchi M, Karasawa Y, Enoki T, Ito M. Intraocular inflammatory cytokines in patients with neovascular age-related macular degeneration before and after initiation of intravitreal injection of anti-VEGF inhibitor. *Sci Rep*. 2018;8(1):1-10. doi:10.1038/s41598-018-19594-6

30. Sato T, Takeuchi M, Karasawa Y, Takayama K, Enoki T. Comprehensive expression patterns of inflammatory cytokines in aqueous humor of patients with neovascular age-related macular degeneration. *Sci Rep*. 2019;9(1):1-13. doi:10.1038/s41598-019-55191-x

31. Schori C, Trachsel C, Grossmann J, Zygoula I, Barthelmes D, Grimm C. The proteomic landscape in the vitreous of patients with age-related and diabetic retinal disease. *Investig Ophthalmol Vis Sci*. 2018;59(4):AMD31-AMD40. doi:10.1167/iovs.18-24122

32. Subhi Y, Krogh Nielsen M, Molbech CR, et al. Association of CD11b+ Monocytes and Anti-Vascular Endothelial Growth Factor Injections in Treatment of Neovascular Age-Related Macular Degeneration and Polypoidal Choroidal Vasculopathy. *JAMA Ophthalmol*. 2019;137(5):515-522. doi:10.1001/jamaophthalmol.2019.0010

33. Ueda-Consolvo T, Hayashi A, Ozaki M, Nakamura T, Yagou T, Abe S. The relationship between vascular endothelial dysfunction and treatment frequency in neovascular age-related macular degeneration. *Jpn J Ophthalmol*. 2017;61(4):347-353. doi:10.1007/s10384-017-0515-z

34. Vanderbeek BL, Zacks DN, Talwar N, Nan B, Stein JD. Role of statins in the development and progression of age-related macular degeneration. *Retina*. 2013;33(2):414-422. doi:10.1097/IAE.0b013e318276e0cf

35. Yao J, Liu X, Yang Q, et al. Proteomic analysis of the aqueous humor in patients with wet age-related macular degeneration. *Proteomics - Clin Appl*. 2013;7(7-8):550-560. doi:10.1002/prca.201200012

36. Yi QY, Wang YY, Chen LS, et al. Implication of inflammatory cytokines in the aqueous humour for management of macular diseases. *Acta Ophthalmol*. 2020;98(3):e309-e315. doi:10.1111/aos.14248

37. Yip JLY, Khawaja AP, Chan MPY, et al. Cross sectional and longitudinal associations between cardiovascular risk factors and age related macular degeneration in the EPICNorfolk eye study. *PLoS One*. 2015;10(7):1-11. doi:10.1371/journal.pone.0132565

**Supplemental Figure 1.** Joanna Briggs Institute Critical Appraisal Tools for included studies.


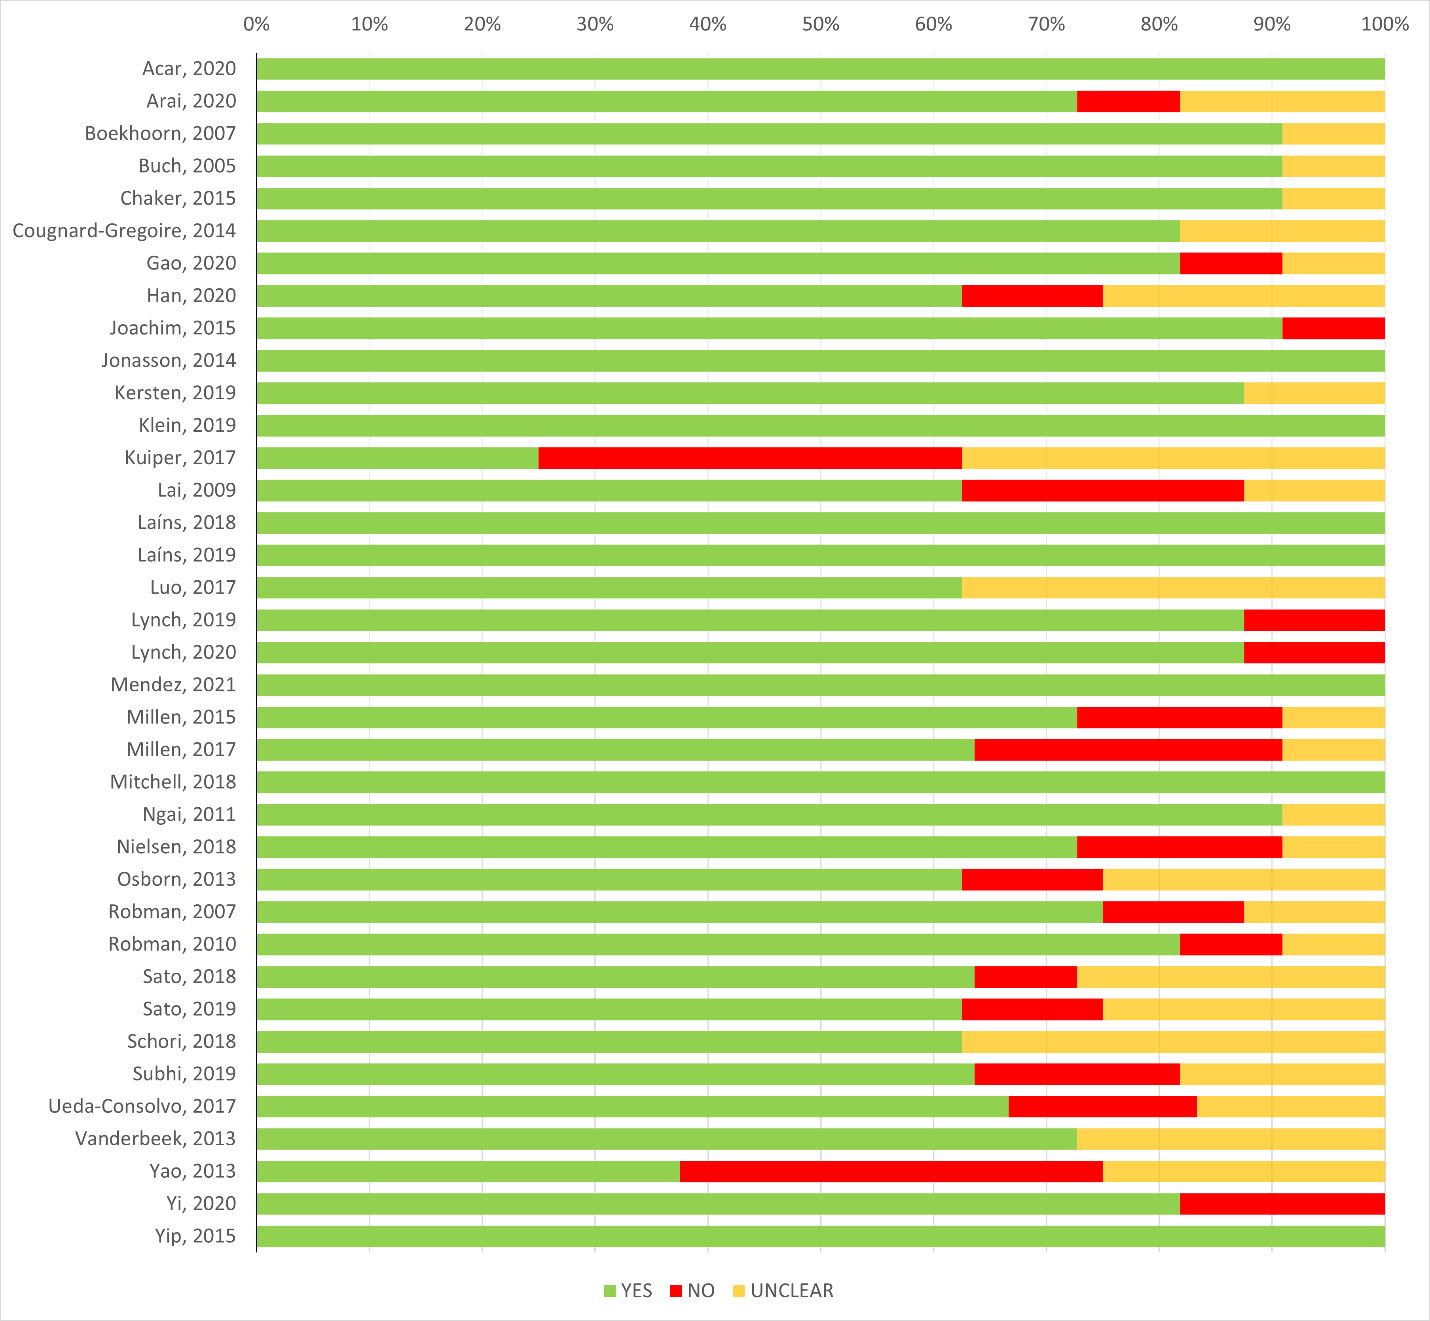


**Notes**: The Joanna Briggs Institute Critical Appraisal Tools provides 8-11 questions based on study type. The legend “Yes”, “No”, and “Unclear” refer to the possible answers to these questions. The response “Yes” indicates that the study successfully accounted for a risk of bias, while “No” means they did not.
